# Supplementary material for: Somatic instability of the expanded GAA repeats in Friedreich’s ataxia
Source: PubMed Central journal article supplement (PMC5736210; doi:10.1371/journal.pone.0189990), 2017-12-19

**S1 Fig. Long et al.**

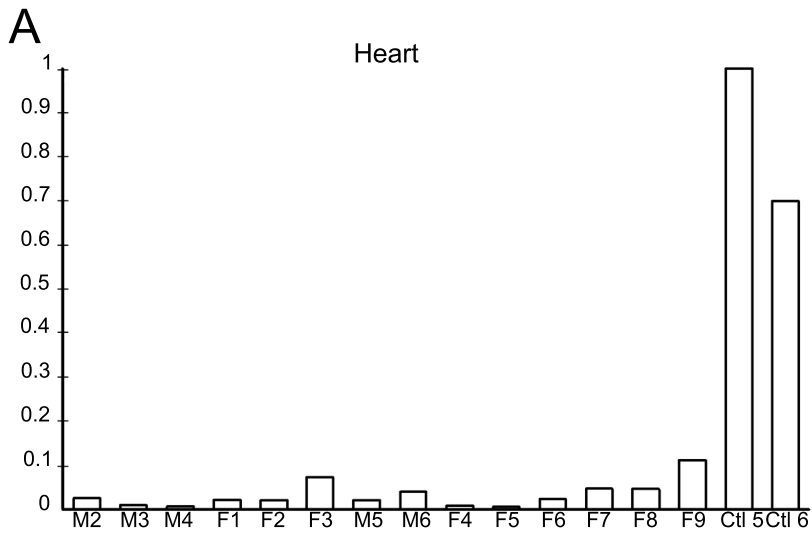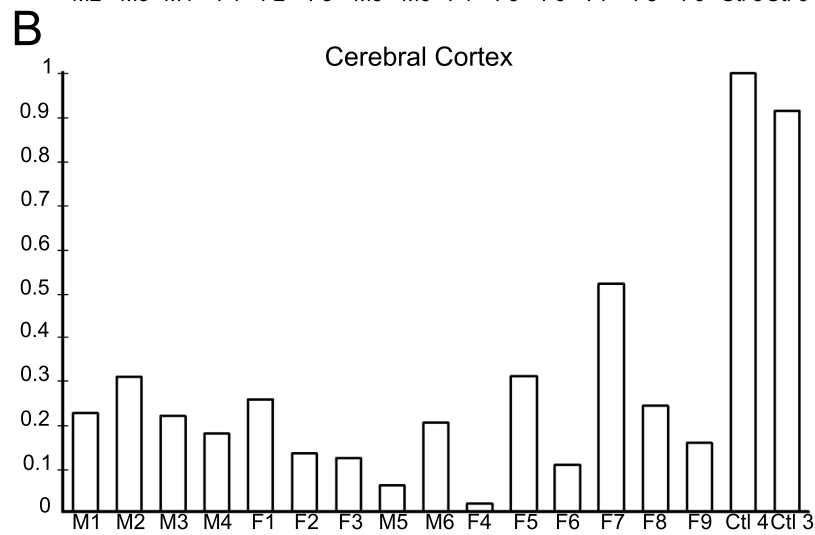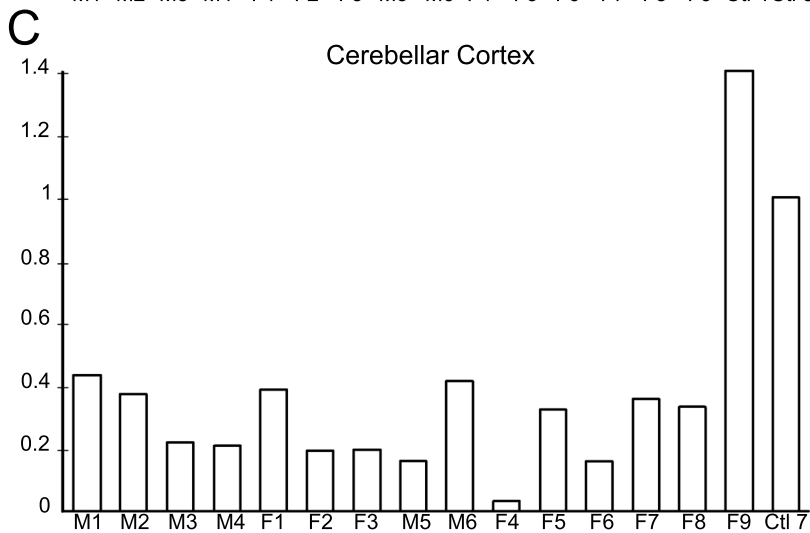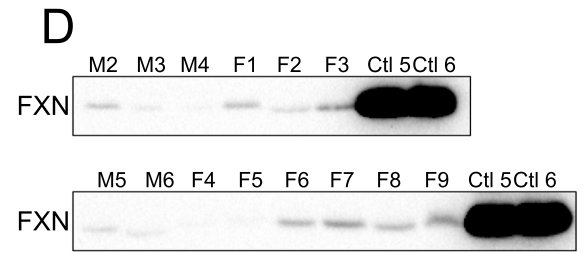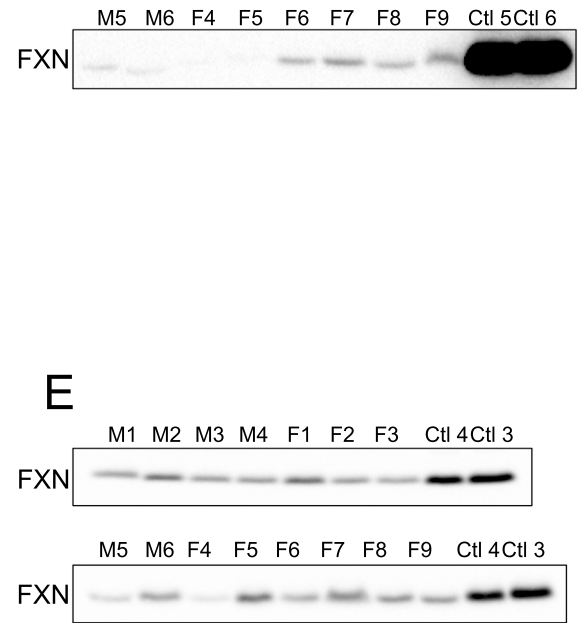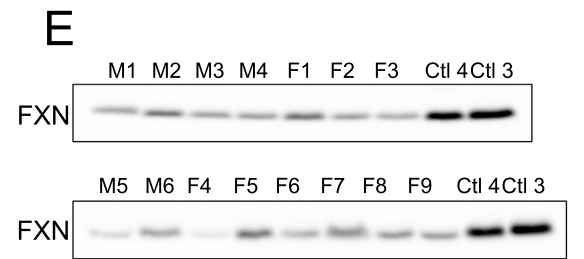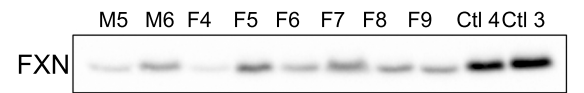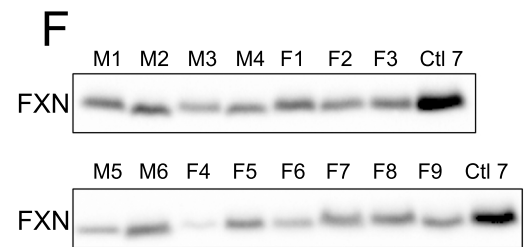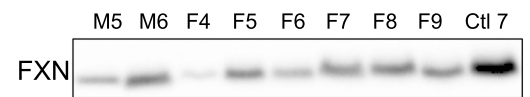

Supplement: pone.0189990.s001.pdf [file pone.0189990.s001.pdf]
