# Supplementary material for: Somatic instability of the expanded GAA repeats in Friedreich’s ataxia
Source: PubMed Central journal article supplement (PMC5736210; doi:10.1371/journal.pone.0189990), 2017-12-19

S2 Fig. Long, et al.

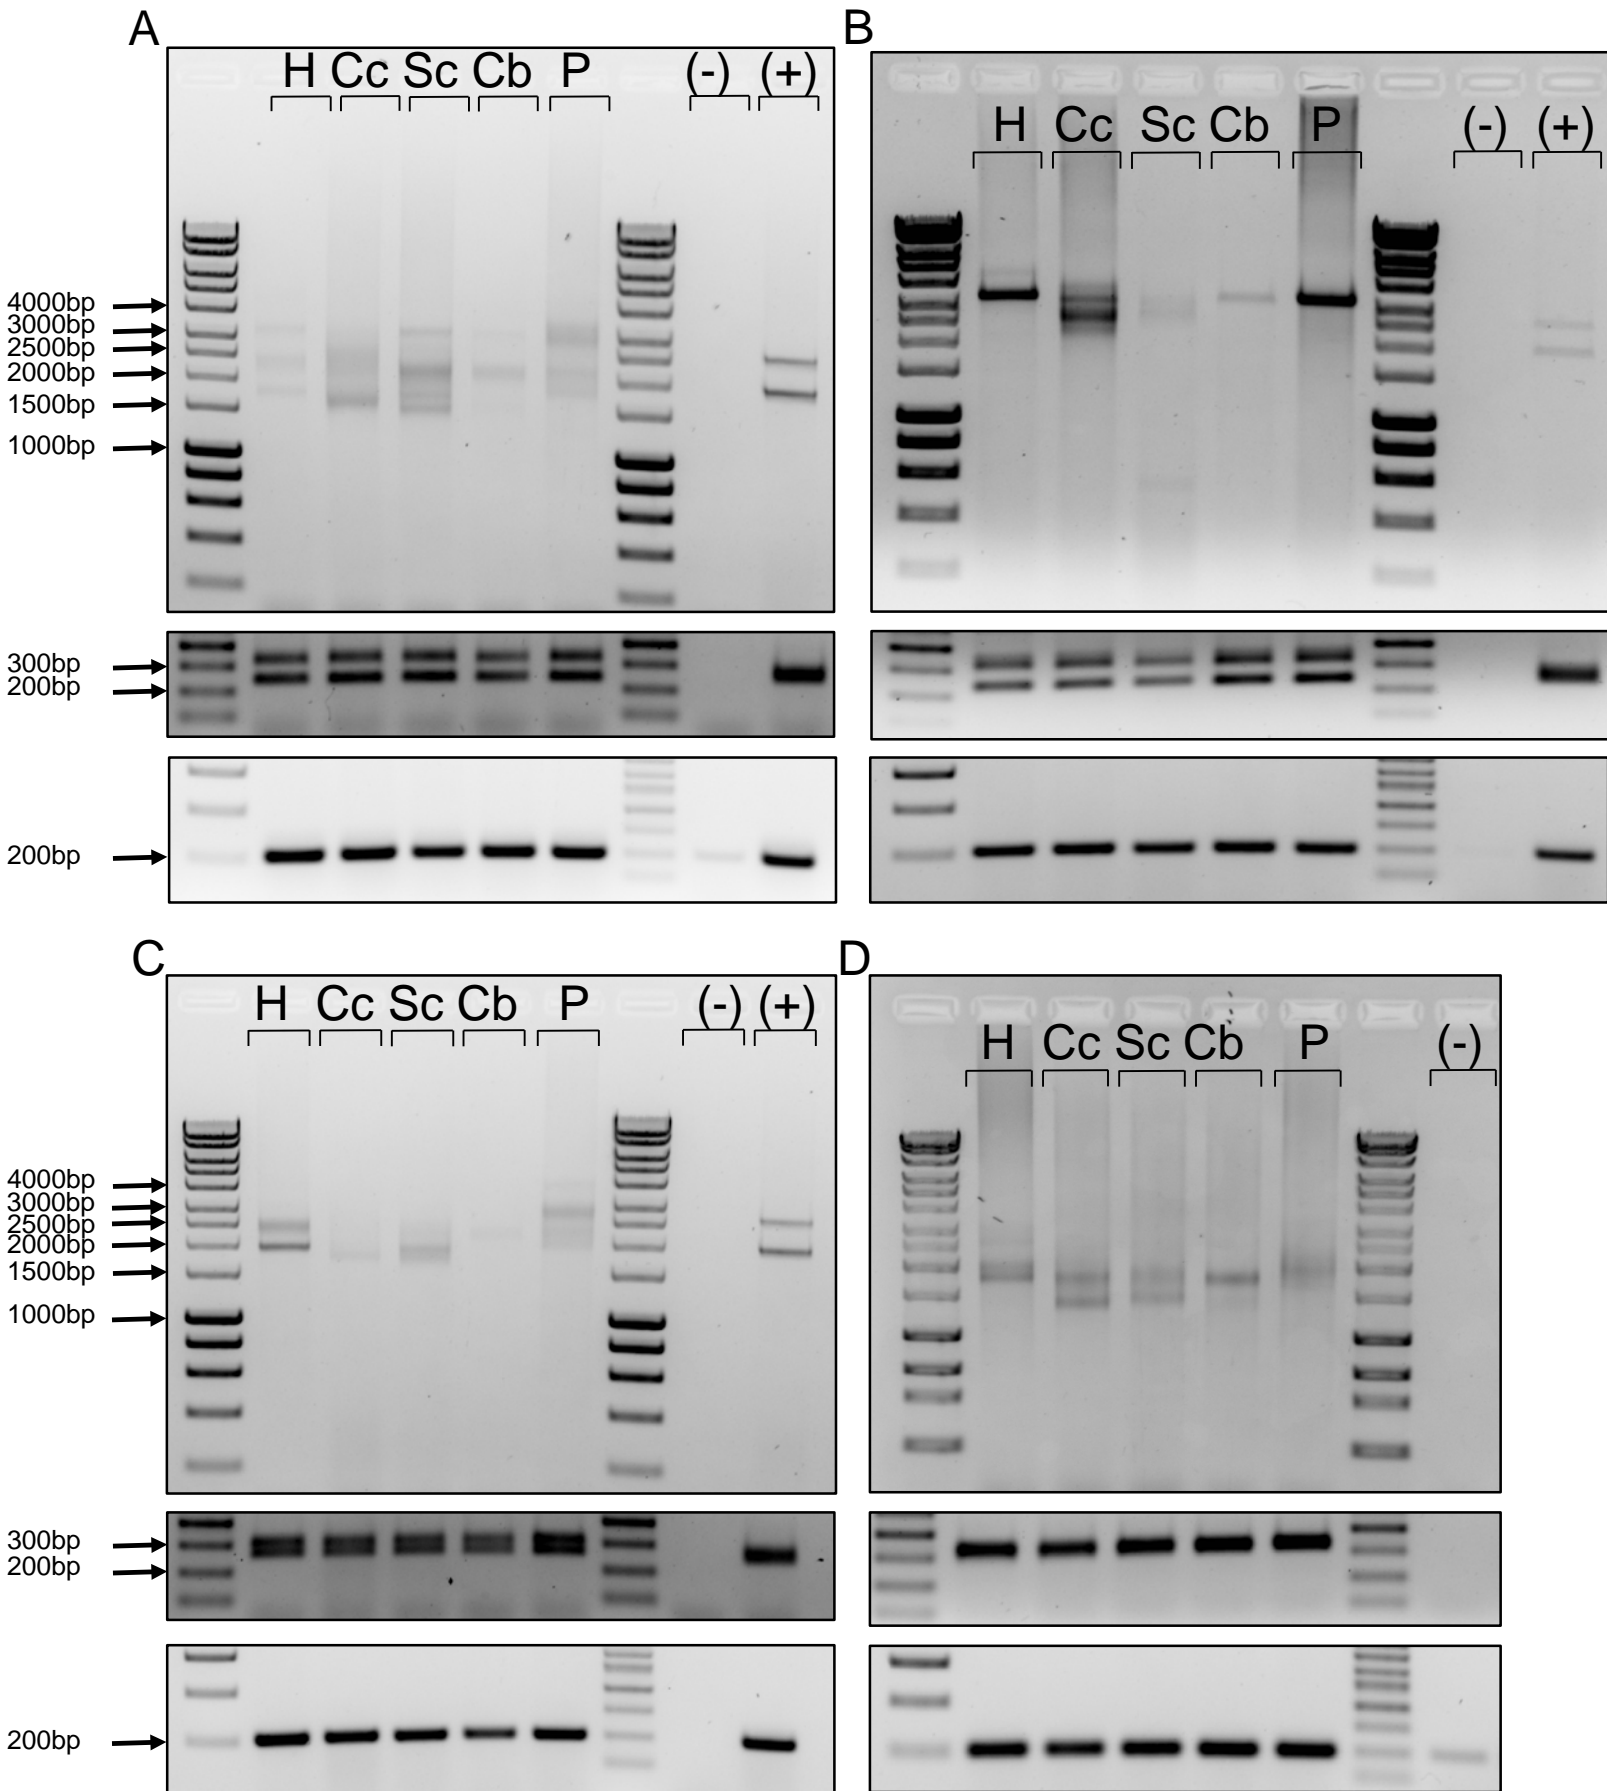

S2 Fig. Long, et al.

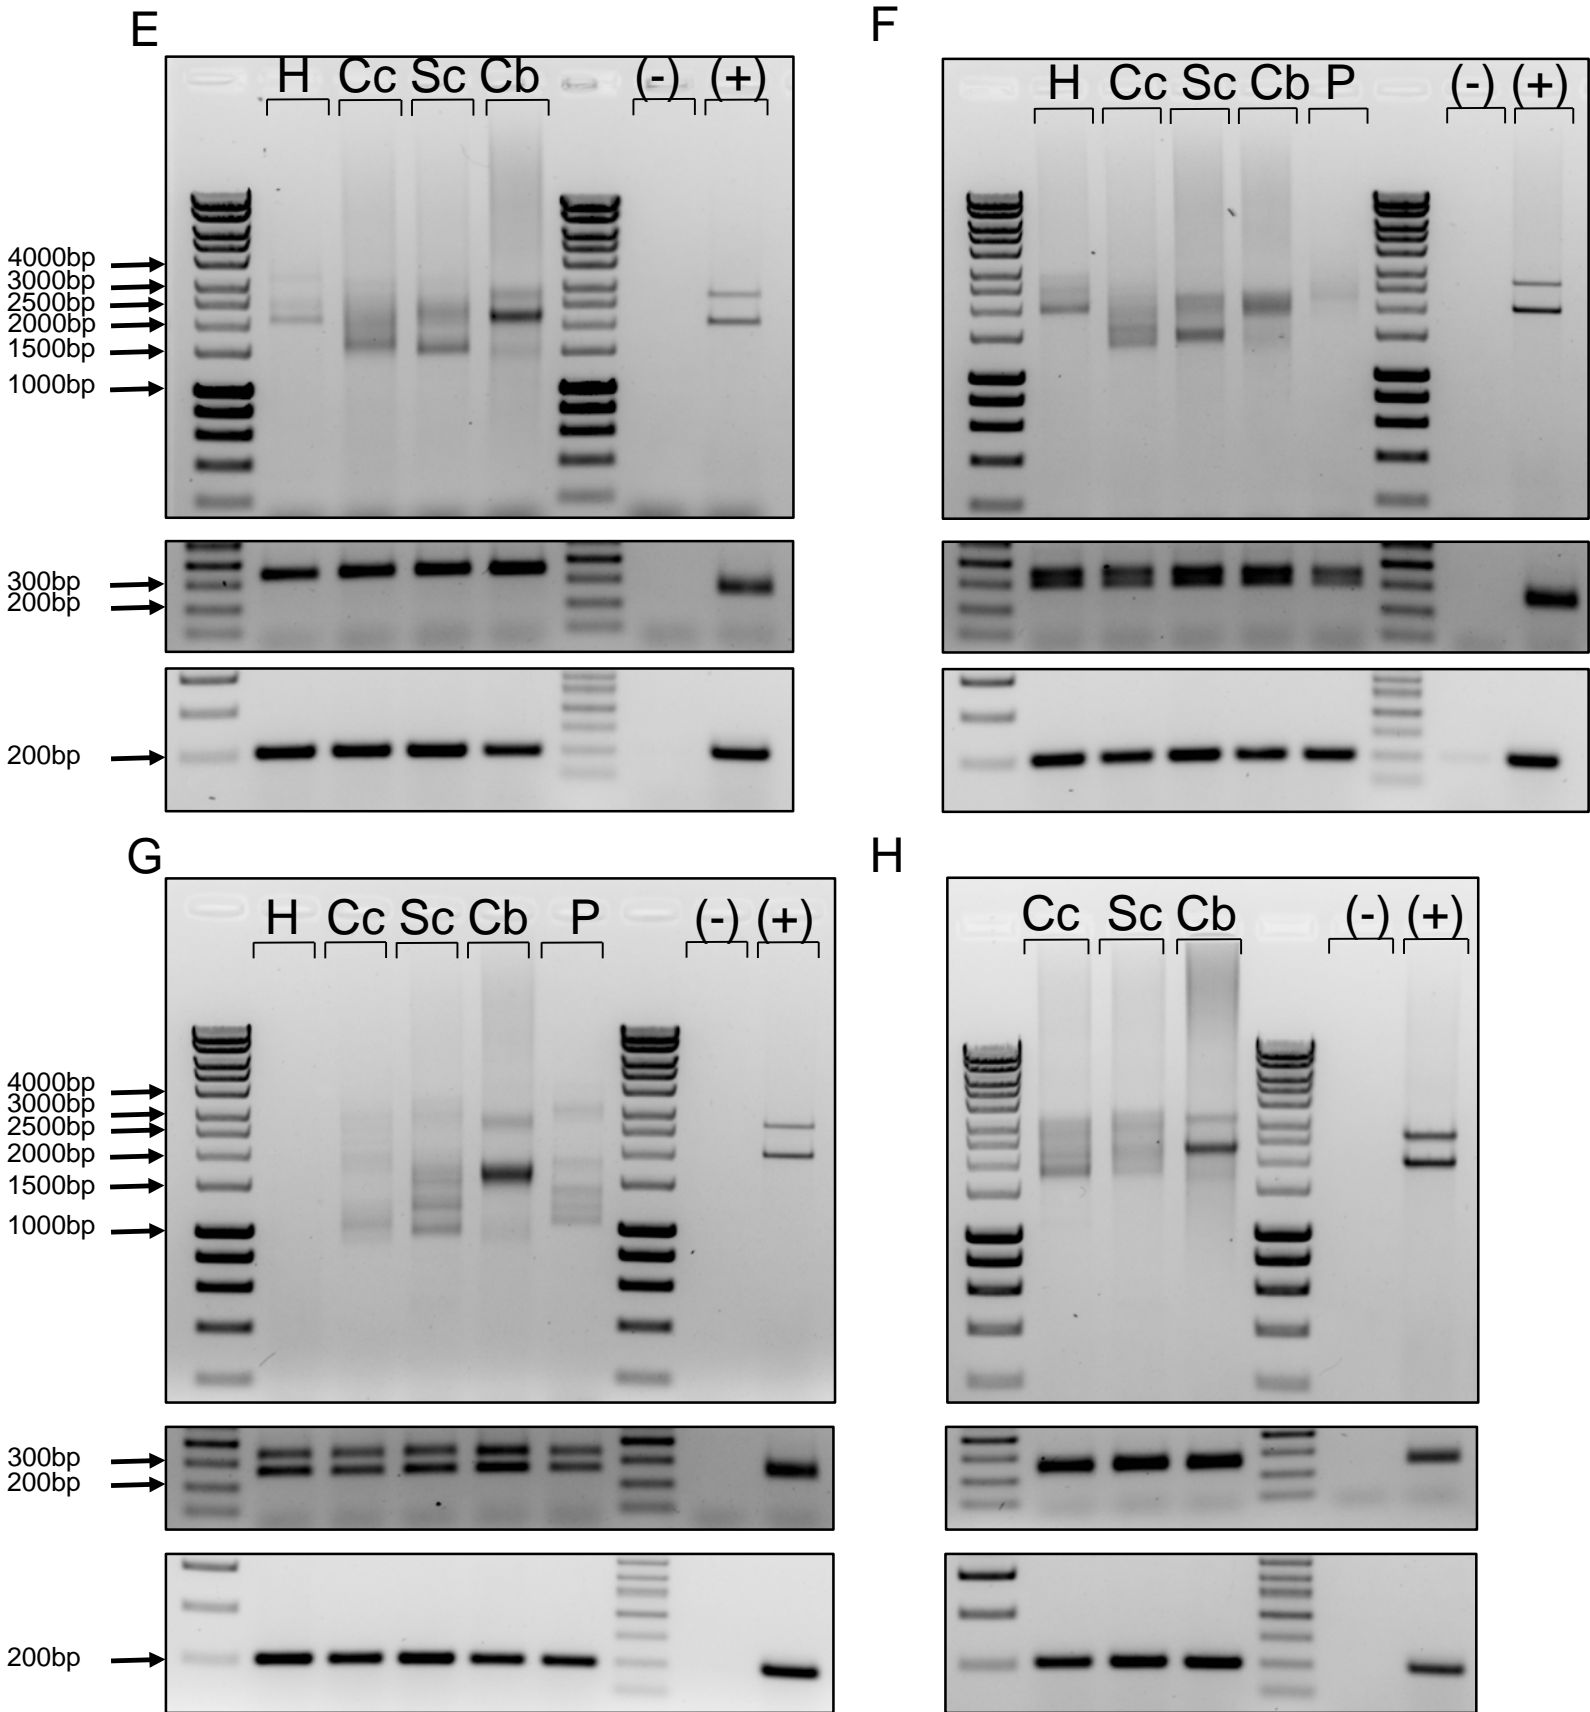

S2 Fig. Long, et al.

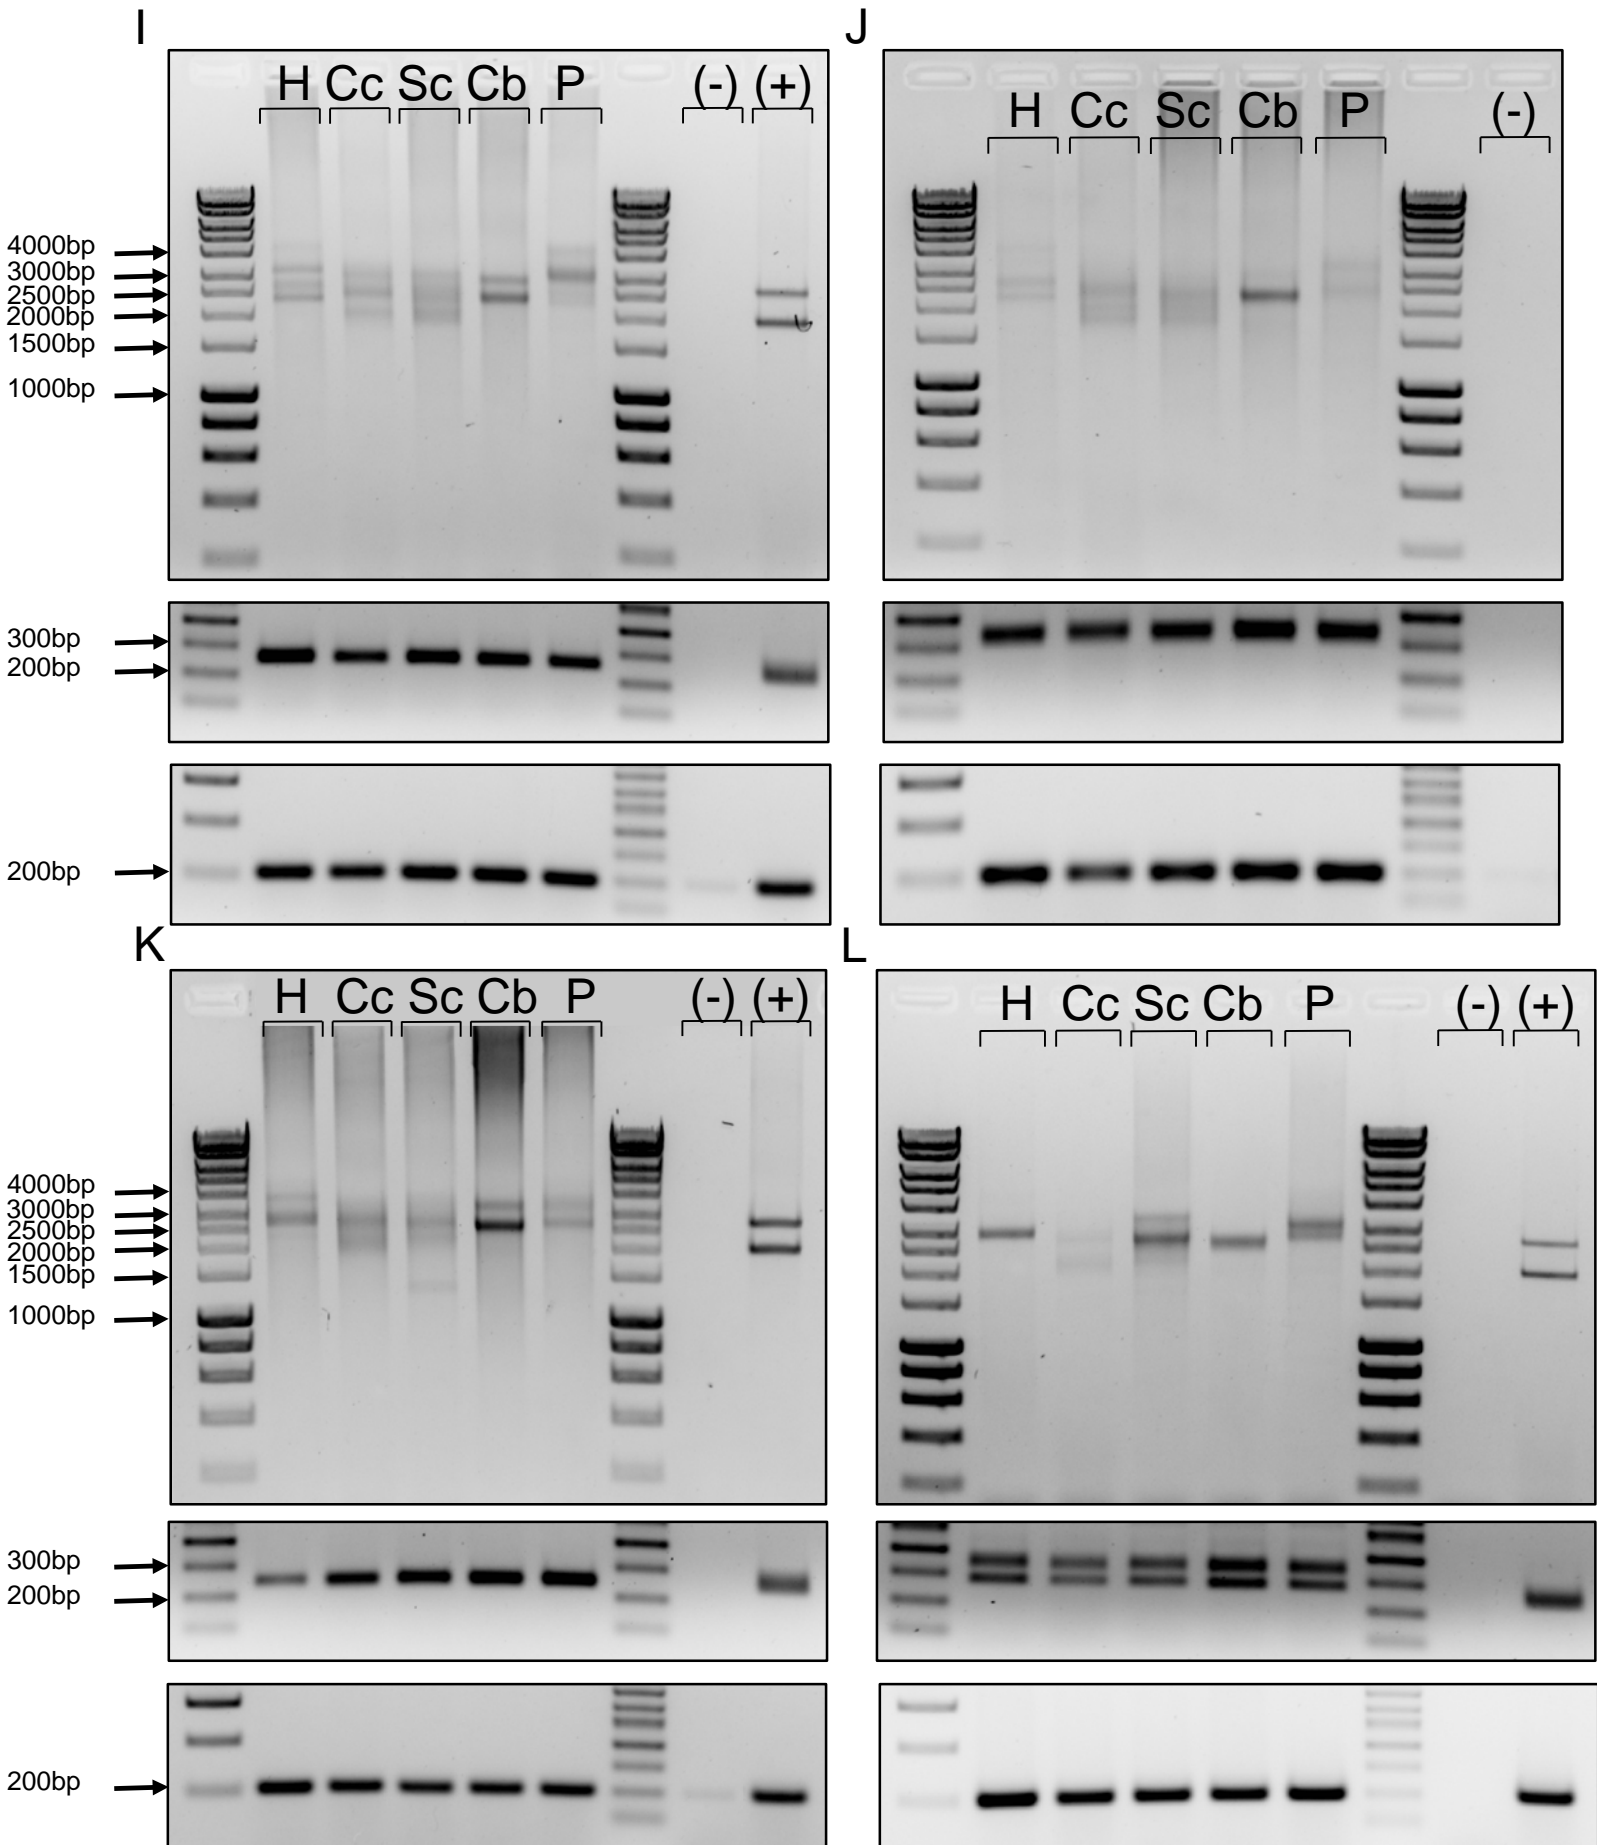

Supplement: pone.0189990.s002.pdf [file pone.0189990.s002.pdf]
