# Supplementary material for: Somatic instability of the expanded GAA repeats in Friedreich’s ataxia
Source: PubMed Central journal article supplement (PMC5736210; doi:10.1371/journal.pone.0189990), 2017-12-19

S3 Fig. Long et al.

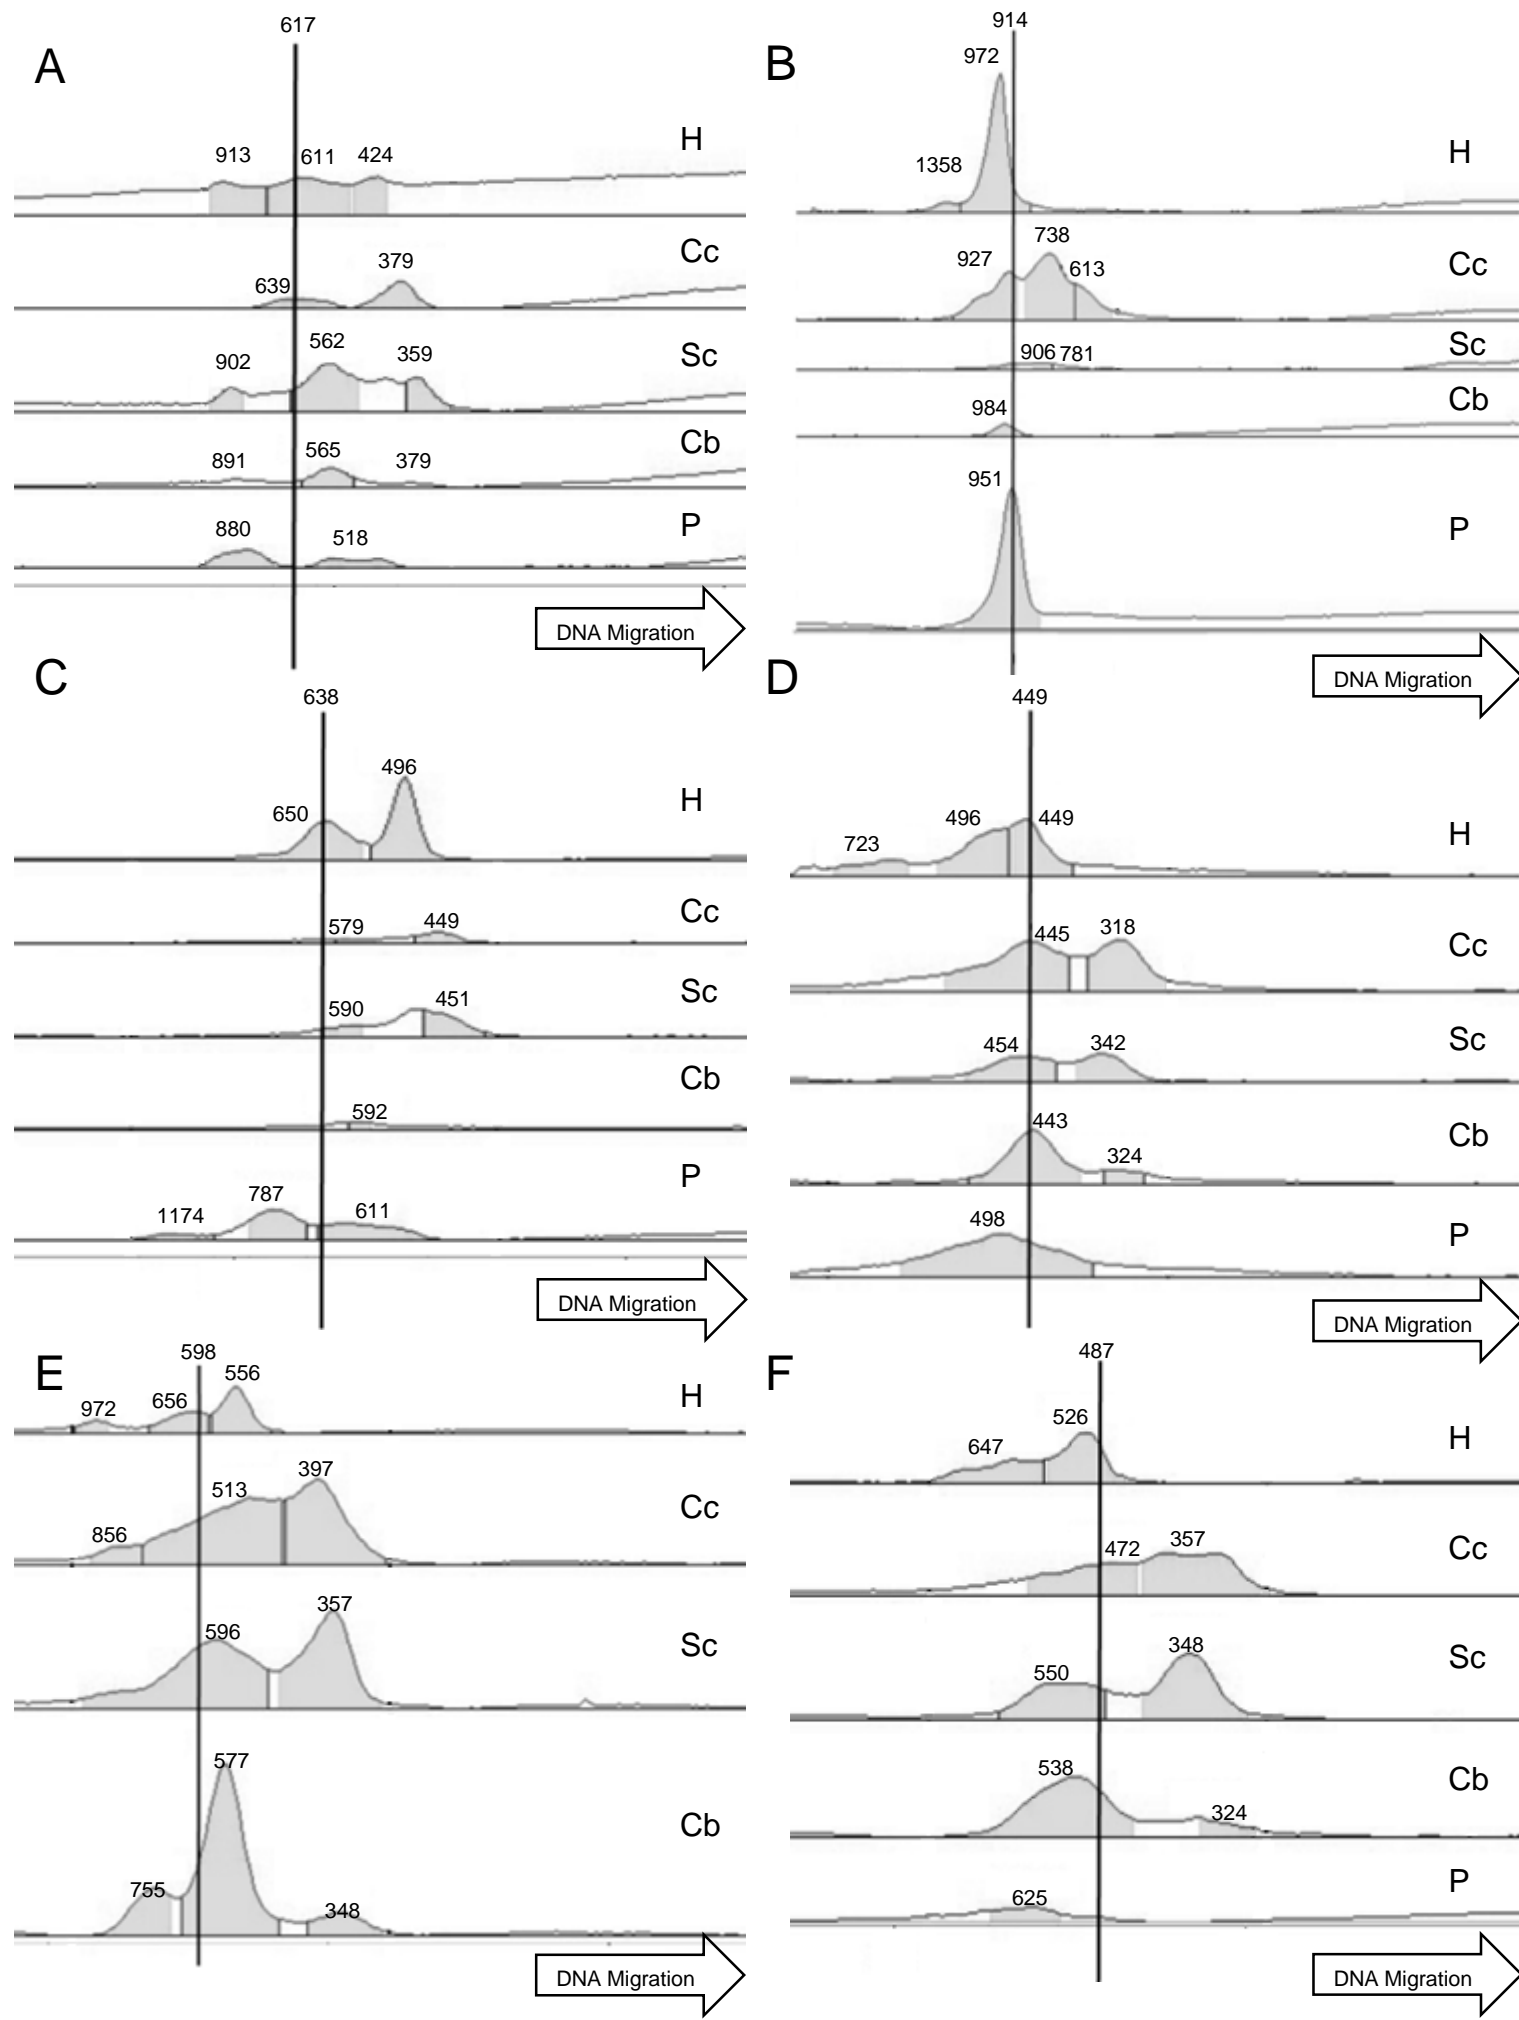

S3 Fig. Long et al.

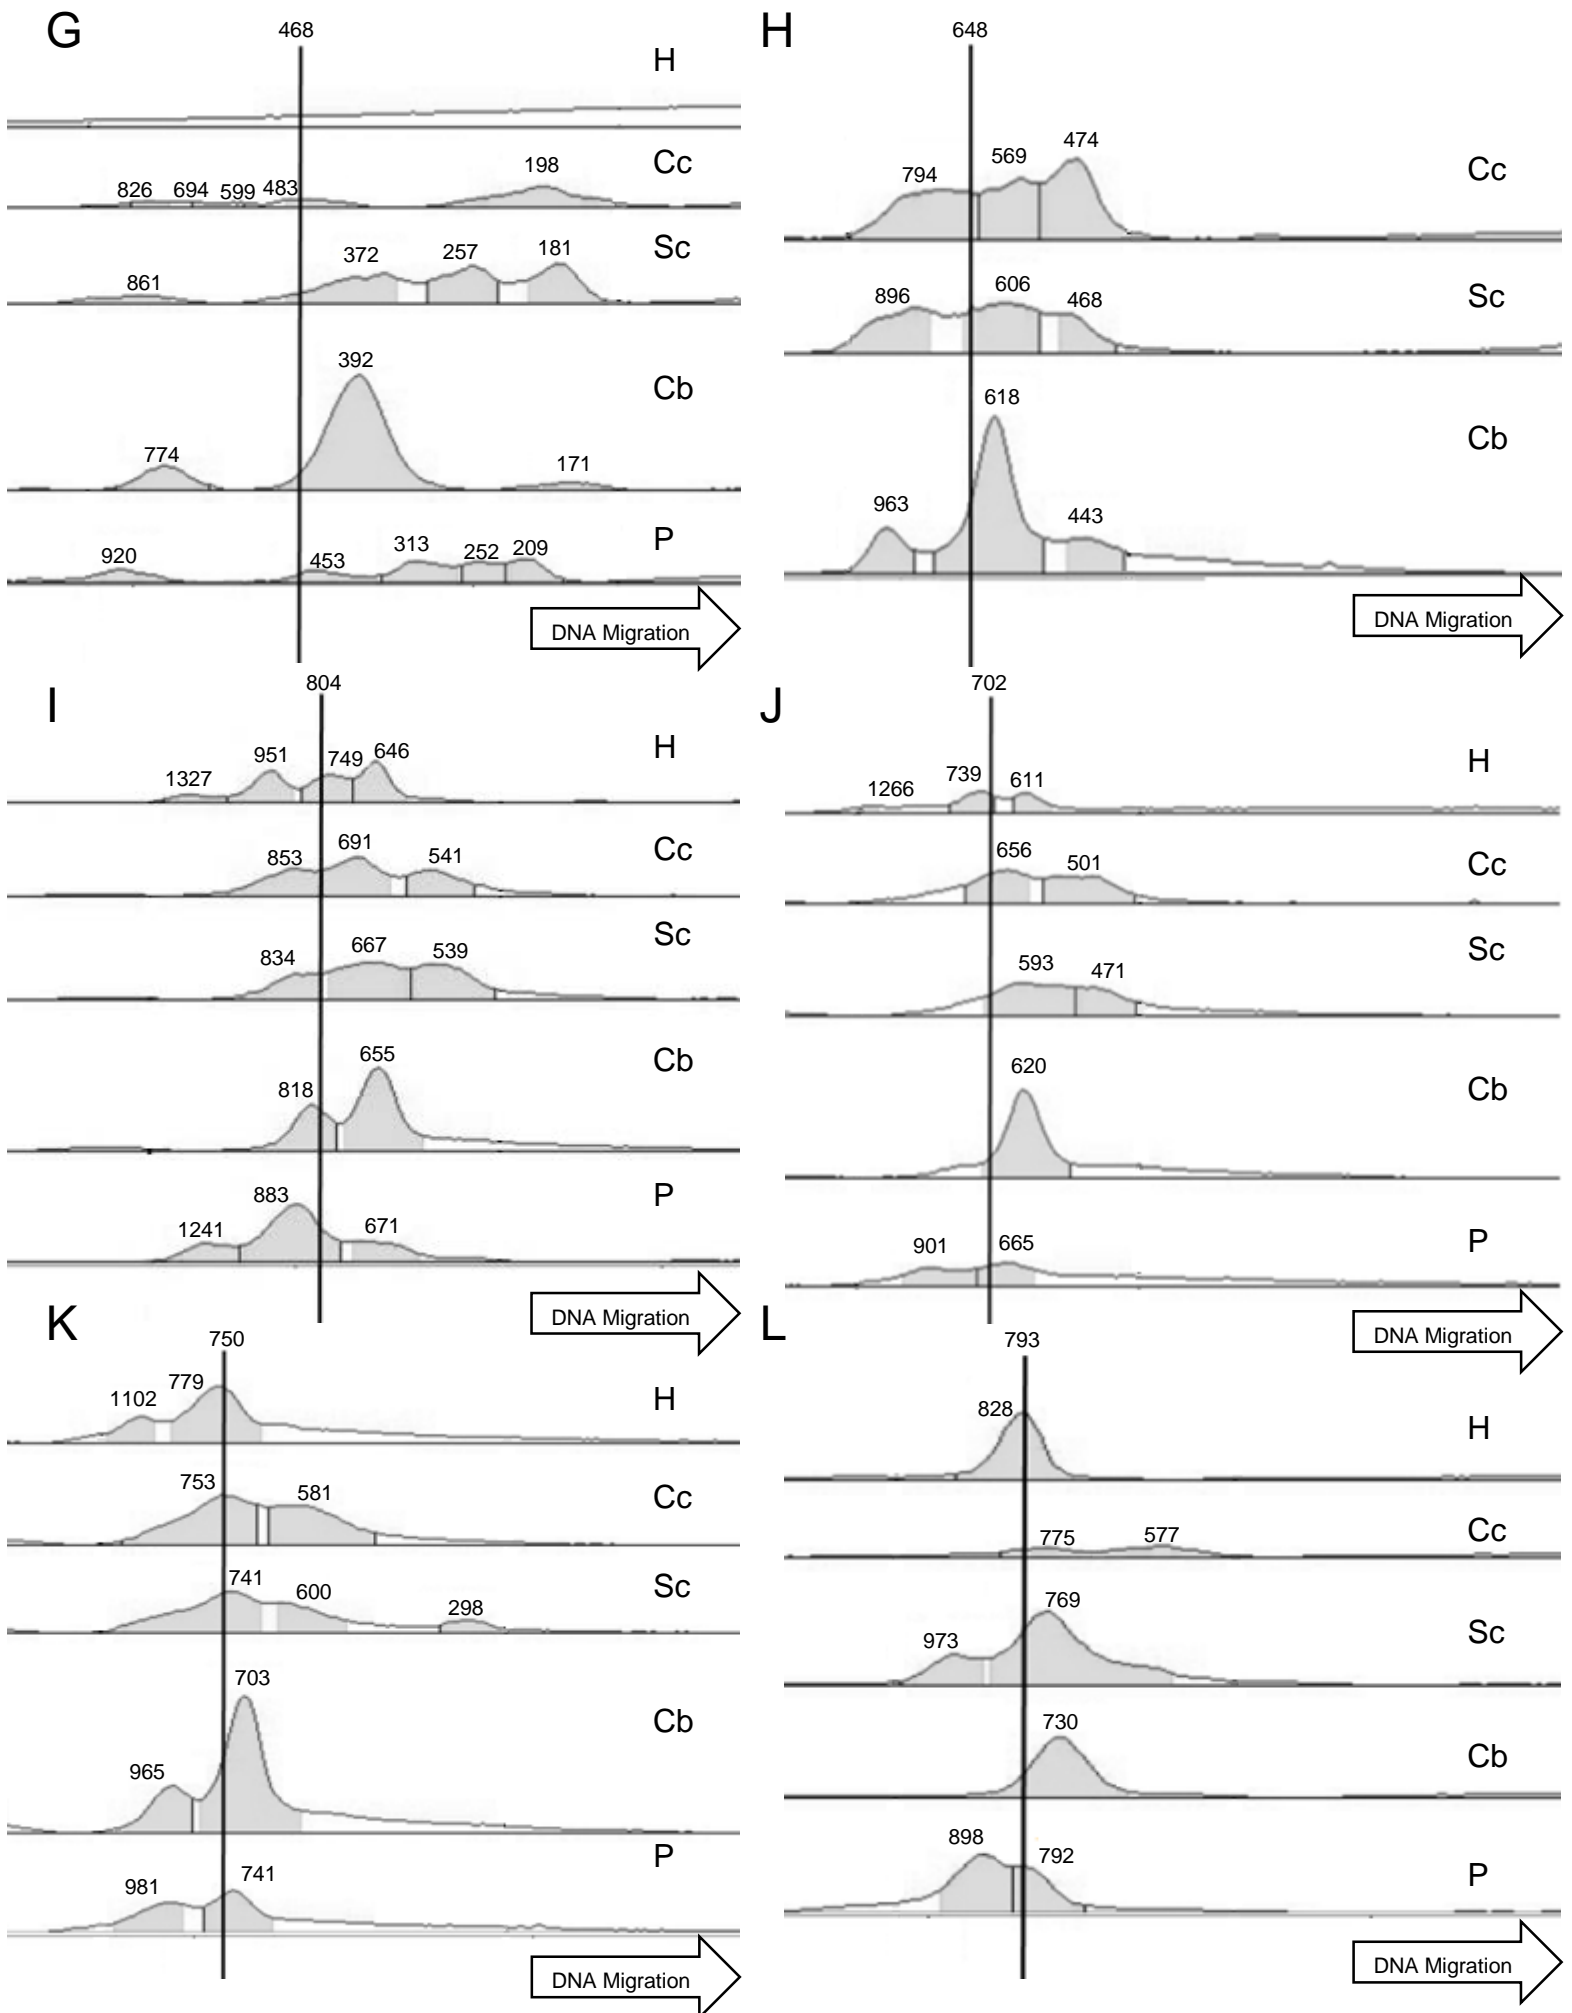

Supplement: pone.0189990.s003.pdf [file pone.0189990.s003.pdf]
