# Supplementary material for: Somatic instability of the expanded GAA repeats in Friedreich’s ataxia
Source: PubMed Central journal article supplement (PMC5736210; doi:10.1371/journal.pone.0189990), 2017-12-19

**S4 Fig. Long et al.**

**A**

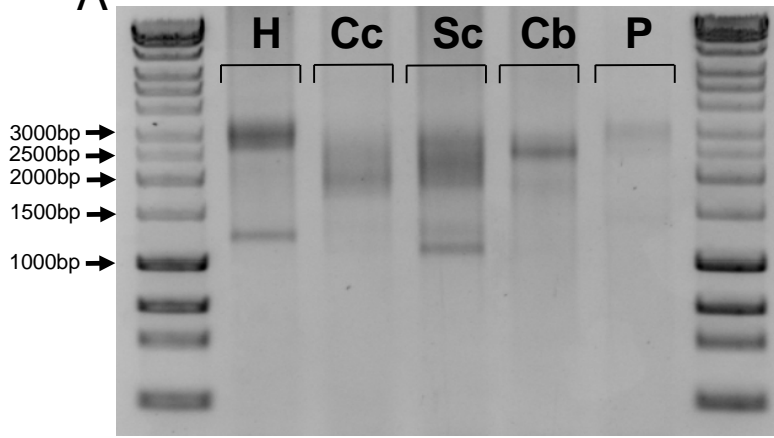

**B**

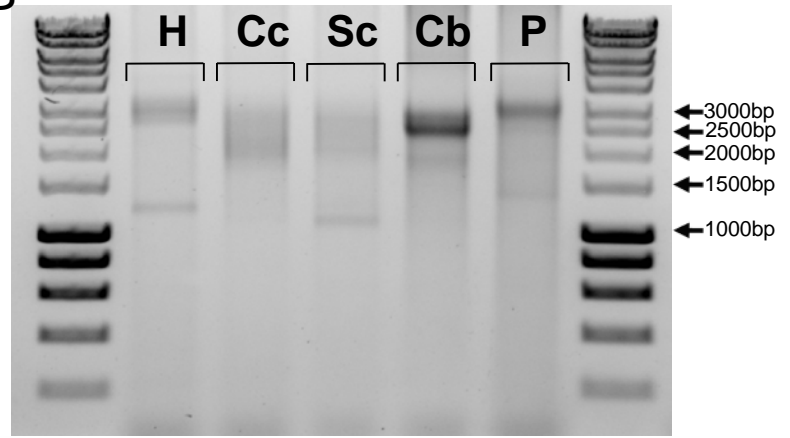

**C**

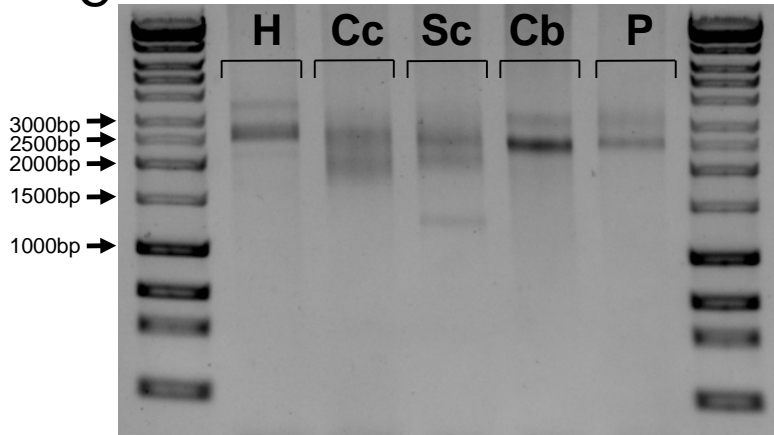

**D**

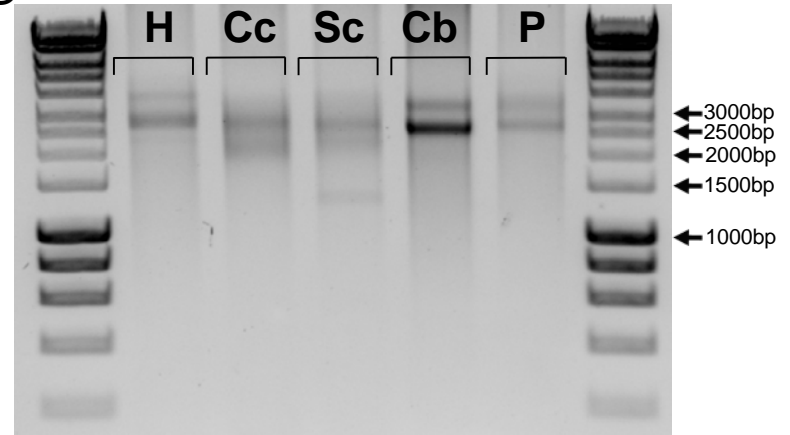

Supplement: pone.0189990.s004.pdf [file pone.0189990.s004.pdf]
